# Supplementary material for: Misperceived invasion: the Lusitanian slug (Arion lusitanicus auct. non-Mabille or Arion vulgaris Moquin-Tandon 1855) is native to Central Europe
Source: PubMed Central journal article supplement (PMC4105919; doi:10.1111/eva.12177), 2014-06-17
Supplement: eva0007-0702-SD1.pdf [file eva0007-0702-SD1.pdf]

## Supplementary Information 1

### Development of ZF locus

For individuals of the clade identified as belonging to the focal species, we sequenced additionally a nuclear locus. Primers for this locus were developed from a low coverage (<10%) genomic shotgun on a 454 platform (for a principle account on the proceeding see Feldmeyer et al. 2010). Briefly, we x-blasted singleton reads larger than 500 bp against the non-redundant protein data base of NCBI and retained six reads with e-values below e-5. For these reads, we developed primers with the online tool Primer3 (Rozen and Skaletsky, 1998; [http://biotools.umassmed.edu/bioapps/primer3\\_www.cgi](http://biotools.umassmed.edu/bioapps/primer3_www.cgi)). Of the six reads, four yielded PCR products of the expected length. Sequencing the products as described above, a single locus, with a significant BLAST hit against a zinc-finger protein, appeared to amplify a single locus and proved to be polymorphic.

Table 1. Primer for the amplification of COI, ZF and ND1

| Primer              | 5'-3' Sequence             | Reference               |
|---------------------|----------------------------|-------------------------|
| LCOI (forward)      | GGTCAACAAATCATAAAGATATTGG  | Folmer et al. 1994      |
| HCOI (reverse)      | TAAACTTCAGGGTGACCAAAAAATCA |                         |
| ZF (forward)        | TGTTTGGGAATCTAGAGCCTGA     | results of own shot gun |
| ZF (reverse)        | TTTGTTGCTGTCCTGCTTGT       | sequencing              |
| MOL_NAD1F (forward) | CGRAARGGMCCTAACAARGTTGG    | Quinteiro et al. 2005   |
| MOL_NAD1R (reverse) | GGRGCACGATTWTGCTCNGCA      |                         |

Table2. Concentrations of chemicals for PCRs (total volume 25µl)

| Locus        | Chemical                        | Volume (µl) |
|--------------|---------------------------------|-------------|
| COI and ZF   | 10x buffer                      | 2.5         |
|              | 100 mM MgCl <sub>2</sub>        | 2.0         |
|              | 20 mM dNTP-Mix                  | 0.3         |
|              | 10 pmol LCOI                    | 1.0         |
|              | 10 pmol HCOI                    | 1.0         |
|              | Taq-Polymerase                  | 0.3         |
|              | ddH <sub>2</sub> O              | 11.4        |
|              | Bovine Serum Albumin (10 mg/mL) | 1.5         |
| Template DNA | 5.0                             |             |
| ND1          | 10x buffer                      | 2.5         |
|              | 100 mM MgCl <sub>2</sub>        | 2.0         |
|              | 20 mM dNTP-Mix                  | 0.3         |
|              | 10 pmol LCOI                    | 1.0         |
|              | 10 pmol HCOI                    | 1.0         |
|              | Taq-Polymerase                  | 0.3         |
|              | ddH <sub>2</sub> O              | 11.15       |
|              | Bovine Serum Albumin (10 mg/mL) | 1.5         |
|              | Dimethylsulfoxid (DMSO)         | 0.25        |
| Template DNA | 5.0                             |             |

Table 3. Protocols for PCR reactions

COI:

| Step             | Temperature (°C) | Time (min.) | Iterations |
|------------------|------------------|-------------|------------|
| Denaturation     | 95               | 01:00       |            |
| Denaturation     | 95               | 00:30       | 30         |
| Annealing        | 52 / 45          | 00:30       | 30         |
| Elongation       | 72               | 00:30       | 30         |
| Final elongation | 72               | 03:00       |            |
| Storage          | 8                | ∞           | ∞          |

ZF and ND1:

| Step             | Temperature (°C) | Time (min.) | Iterations |
|------------------|------------------|-------------|------------|
| Denaturation     | 95               | 01:00       |            |
| Denaturation     | 95               | 00:30       | 30         |
| Annealing        | 52               | 00:30       | 30         |
| Elongation       | 72               | 00:30       | 30         |
| Final elongation | 72               | 03:00       |            |
| Storage          | 8                | ∞           | ∞          |

## Supplementary Information 2

Figure 1. ML phylogeny of ND1 locus. The topotypic *A. lusitanicus* does not cluster with the *A. lusitanicus* from the invasion area. The ND1 locus does not resolve *A. rufus* from the latter. Numbers on nodes present bootstraps > 90%.

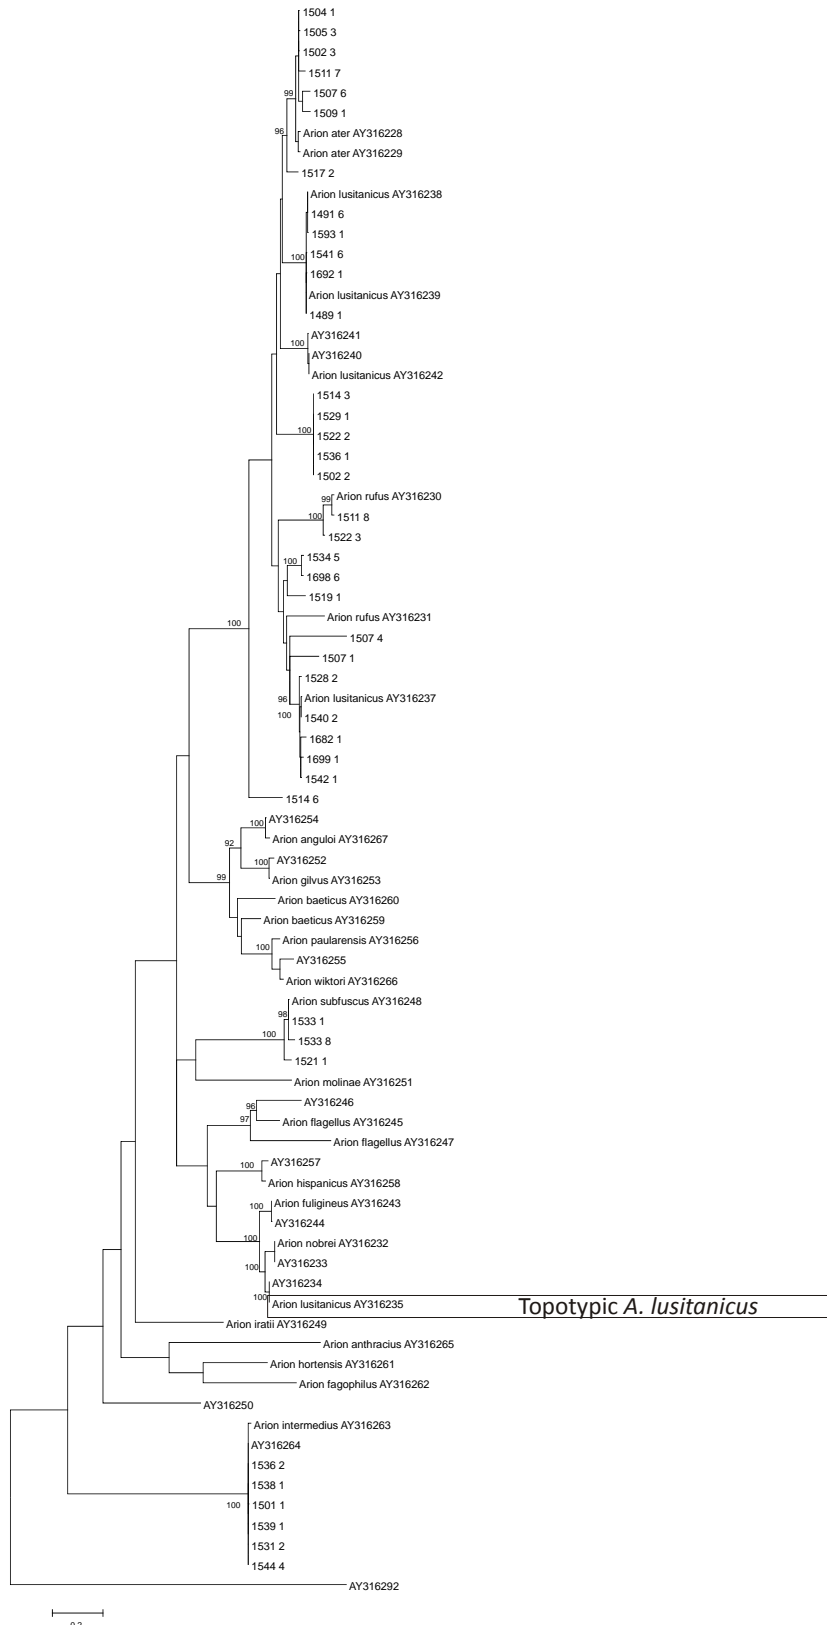

Figure 2. Distribution of clades sampled in the study. The numbering follows Figure 2 of the article.

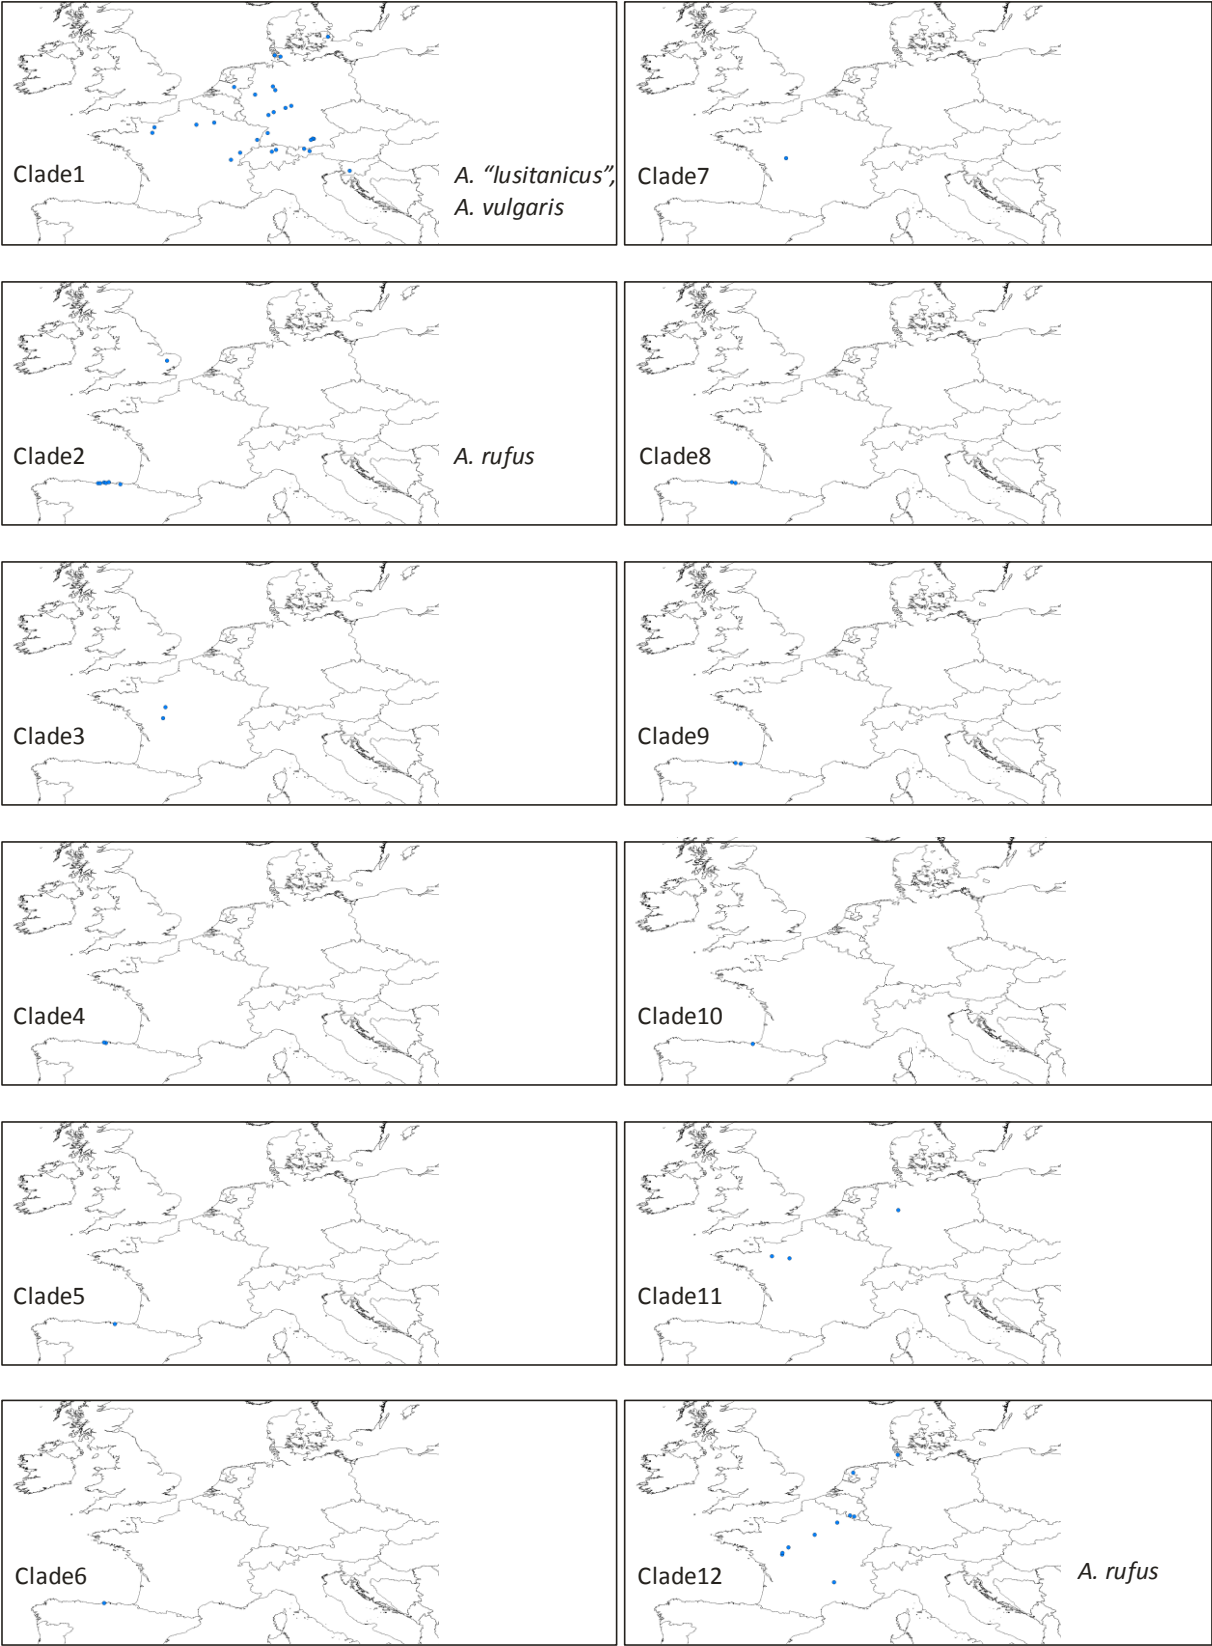

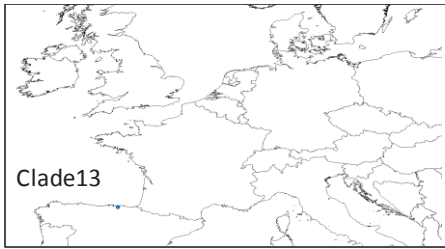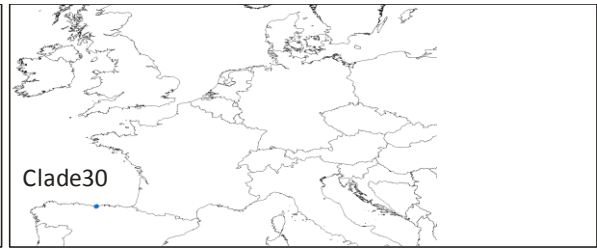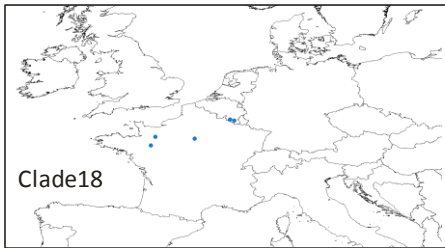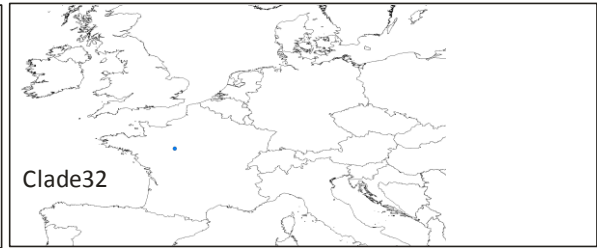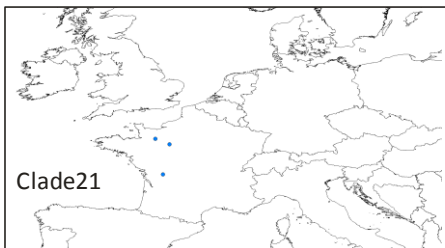

*A. subfuscus*

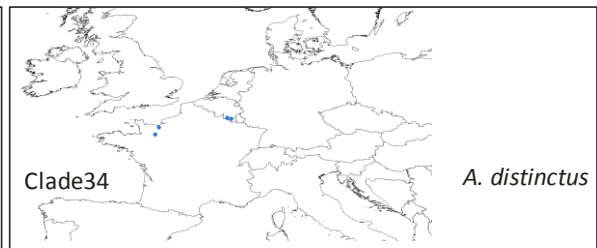

*A. distinctus*

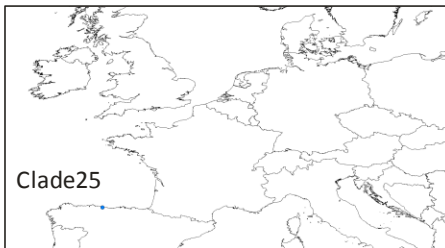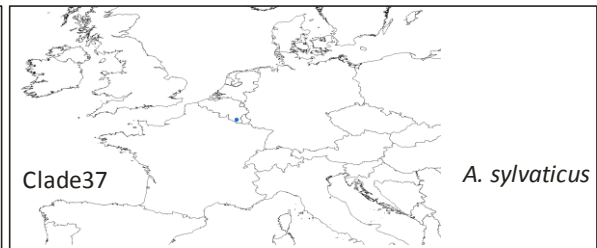

*A. sylvaticus*

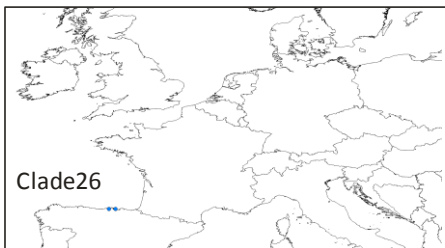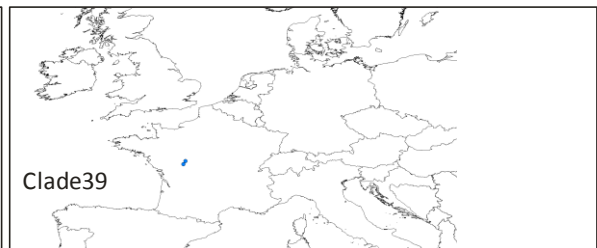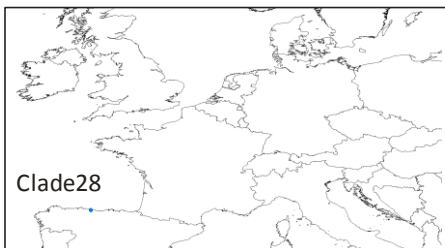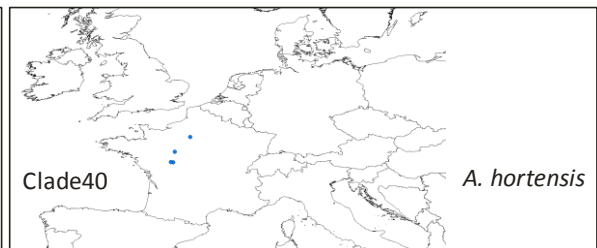

*A. hortensis*

Figure 3. Estimated 80% HDP of location of origin of COI haplotypes MRCA (white shade) and ZF haplotypes (red shade) for Clade 1. The estimated age of the MRCA is 294,000 years (90-780 ka 95% HPD) for COI and 920,000 years (210-3600 ka) for ZF.

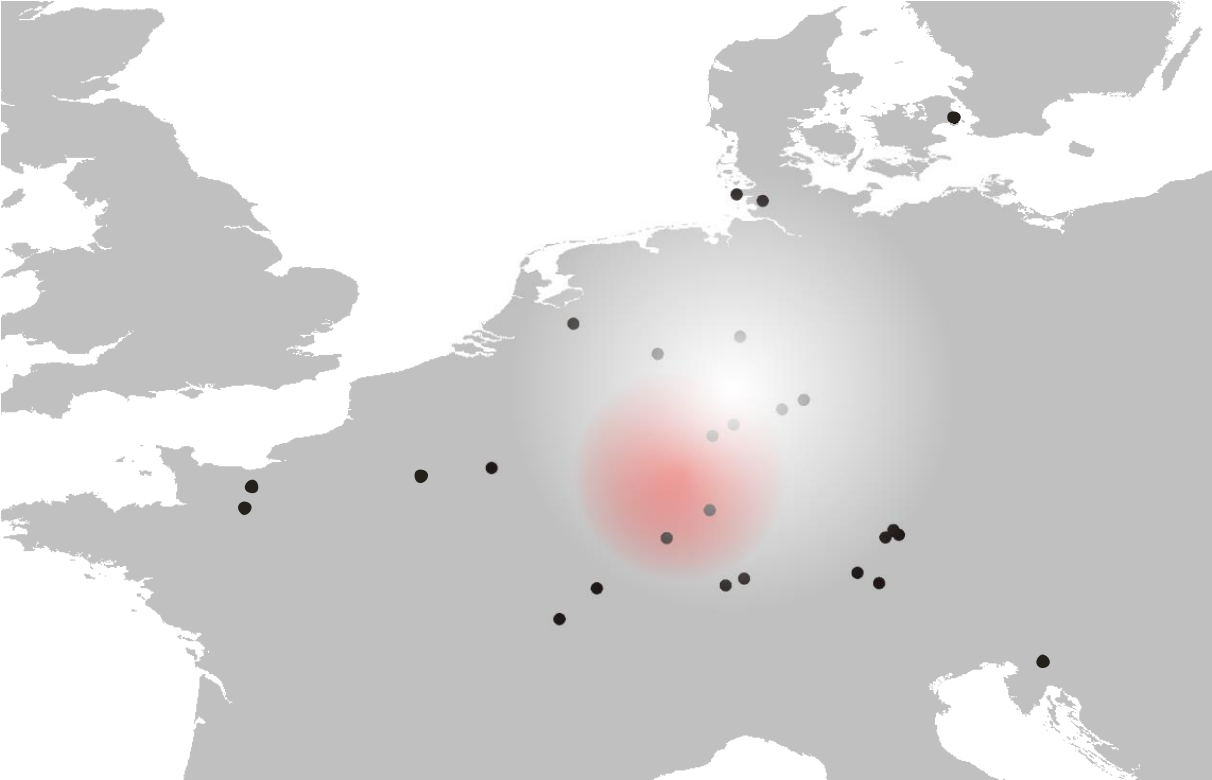









1 List of 166 GenBank Accession nos. with attributed species for COI used for comparative purposes.

|    |          |                     |     |          |                   |     |          |                     |
|----|----------|---------------------|-----|----------|-------------------|-----|----------|---------------------|
| 2  | EF520640 | Arion lusitanicus   | 58  | AJ809440 | Arion fuscus      | 114 | EU382753 | Arion intermedius   |
| 3  | EF520641 | Arion lusitanicus   | 59  | AY987886 | Arion fuscus      | 115 | EU382750 | Arion intermedius   |
| 4  | EF520642 | Arion lusitanicus   | 60  | AJ809411 | Arion fuscus      | 116 | AY423705 | Arion intermedius   |
| 5  | EF520643 | Arion lusitanicus   | 61  | AJ809420 | Arion fuscus      | 117 | EU382745 | Arion intermedius   |
| 6  | EU734823 | Arion lusitanicus   | 62  | AJ809436 | Arion fuscus      | 118 | EU382752 | Arion intermedius   |
| 7  | EU734824 | Arion lusitanicus   | 63  | AJ809432 | Arion fuscus      | 119 | EU382754 | Arion intermedius   |
| 8  | EU734825 | Arion lusitanicus   | 64  | AJ809444 | Arion fuscus      | 120 | EU382749 | Arion intermedius   |
| 9  | EU734826 | Arion lusitanicus   | 65  | AJ809439 | Arion fuscus      | 121 | EU382743 | Arion intermedius   |
| 10 | GQ166169 | Arion lusitanicus   | 66  | AJ809412 | Arion fuscus      | 122 | EU382747 | Arion intermedius   |
| 11 | AY987903 | Arion rufus         | 67  | AJ809427 | Arion fuscus      | 123 | AY987892 | Arion iratii        |
| 12 | AY987902 | Arion rufus         | 68  | AJ809433 | Arion fuscus      | 124 | AY987893 | Arion lizarrustii   |
| 13 | EF520647 | Arion rufus         | 69  | AJ809417 | Arion fuscus      | 125 | AY987896 | Arion molinae       |
| 14 | FJ481178 | Arion rufus         | 70  | AJ809425 | Arion fuscus      | 126 | FJ348255 | Arion occultus      |
| 15 | AY987901 | Arion rufus         | 71  | AJ809441 | Arion fuscus      | 127 | FJ348254 | Arion occultus      |
| 16 | EF520644 | Arion rufus         | 72  | AJ809426 | Arion fuscus      | 128 | AY423702 | Arion owenii        |
| 17 | AY987900 | Arion rufus         | 73  | AJ809418 | Arion fuscus      | 129 | AY423704 | Arion owenii        |
| 18 | EF520646 | Arion rufus         | 74  | AJ809431 | Arion fuscus      | 130 | AY423703 | Arion owenii        |
| 19 | EF520645 | Arion rufus         | 75  | AJ809435 | Arion fuscus      | 131 | AY987897 | Arion owenii        |
| 20 | AY987874 | Arion distinctus    | 76  | AJ809419 | Arion fuscus      | 132 | AY987898 | Arion owenii        |
| 21 | AY987875 | Arion distinctus    | 77  | AJ809446 | Arion fuscus      | 133 | AY987899 | Arion paularensis   |
| 22 | AY423698 | Arion distinctus    | 78  | AJ809424 | Arion fuscus      | 134 | AF513018 | Arion silvaticus    |
| 23 | AY423700 | Arion distinctus    | 79  | AJ809428 | Arion fuscus      | 135 | AY987917 | Arion silvaticus    |
| 24 | EF128218 | Arion distinctus    | 80  | AJ809438 | Arion fuscus      | 136 | AY987918 | Arion silvaticus    |
| 25 | AY423697 | Arion distinctus    | 81  | EU382742 | Arion hortensis   | 137 | AY987916 | Arion subfuscus     |
| 26 | AY423694 | Arion distinctus    | 82  | AY423670 | Arion hortensis   | 138 | AY987909 | Arion subfuscus     |
| 27 | AY423692 | Arion distinctus    | 83  | AY423671 | Arion hortensis   | 139 | AY987911 | Arion subfuscus     |
| 28 | AY423696 | Arion distinctus    | 84  | AY423680 | Arion hortensis   | 140 | GU249577 | Arion subfuscus     |
| 29 | AY423701 | Arion distinctus    | 85  | AY423681 | Arion hortensis   | 141 | GU249582 | Arion subfuscus     |
| 30 | AY423699 | Arion distinctus    | 86  | AY423673 | Arion hortensis   | 142 | GU249580 | Arion subfuscus     |
| 31 | AY987879 | Arion fasciatus     | 87  | AY423687 | Arion hortensis   | 143 | GU249578 | Arion subfuscus     |
| 32 | AY987877 | Arion fasciatus     | 88  | AY423678 | Arion hortensis   | 144 | AY987904 | Arion subfuscus     |
| 33 | AY987878 | Arion fasciatus     | 89  | AY423679 | Arion hortensis   | 145 | GU249579 | Arion subfuscus     |
| 34 | AY987880 | Arion flagellus     | 90  | AY423675 | Arion hortensis   | 146 | AY987914 | Arion subfuscus     |
| 35 | AY987881 | Arion flagellus     | 91  | AY423674 | Arion hortensis   | 147 | GU249583 | Arion subfuscus     |
| 36 | AY987882 | Arion flagellus     | 92  | AY423688 | Arion hortensis   | 148 | GU249581 | Arion subfuscus     |
| 37 | AY987883 | Arion franciscocoli | 93  | AY423683 | Arion hortensis   | 149 | GU249584 | Arion subfuscus     |
| 38 | AY987884 | Arion franciscocoli | 94  | AY423682 | Arion hortensis   | 150 | GU249586 | Arion subfuscus     |
| 39 | AJ809429 | Arion fuscus        | 95  | AY423677 | Arion hortensis   | 151 | AY987912 | Arion subfuscus     |
| 40 | AJ809414 | Arion fuscus        | 96  | AY423685 | Arion hortensis   | 152 | AY987906 | Arion subfuscus     |
| 41 | AJ809423 | Arion fuscus        | 97  | AY423691 | Arion hortensis   | 153 | AY987905 | Arion subfuscus     |
| 42 | AJ809421 | Arion fuscus        | 98  | AY423684 | Arion hortensis   | 154 | AY987907 | Arion subfuscus     |
| 43 | AJ809434 | Arion fuscus        | 99  | AY423672 | Arion hortensis   | 155 | AY987908 | Arion subfuscus     |
| 44 | AJ809416 | Arion fuscus        | 100 | AY423690 | Arion hortensis   | 156 | AY987910 | Arion subfuscus     |
| 45 | AJ809410 | Arion fuscus        | 101 | AY423676 | Arion hortensis   | 157 | GU249576 | Arion subfuscus     |
| 46 | AJ809409 | Arion fuscus        | 102 | AY987889 | Arion hortensis   | 158 | GU249587 | Arion subfuscus     |
| 47 | AJ809430 | Arion fuscus        | 103 | AY987888 | Arion hortensis   | 159 | AY987913 | Arion subfuscus     |
| 48 | AJ809445 | Arion fuscus        | 104 | AY423686 | Arion hortensis   | 160 | GU249585 | Arion subfuscus     |
| 49 | AJ809408 | Arion fuscus        | 105 | AY423689 | Arion hortensis   | 161 | AY987915 | Arion subfuscus     |
| 50 | AY987885 | Arion fuscus        | 106 | AY987891 | Arion intermedius | 162 | AY943858 | Arion transsylvanus |
| 51 | AJ809415 | Arion fuscus        | 107 | EU382755 | Arion intermedius | 163 | AY943860 | Arion transsylvanus |
| 52 | AJ809442 | Arion fuscus        | 108 | EU382756 | Arion intermedius | 164 | AY943859 | Arion transsylvanus |
| 53 | AJ809443 | Arion fuscus        | 109 | AY987890 | Arion intermedius | 165 | AY987919 | Arion urbiae        |
| 54 | AJ809437 | Arion fuscus        | 110 | EU382748 | Arion intermedius | 166 | AY987921 | Arion wiktori       |
| 55 | AY987887 | Arion fuscus        | 111 | EU382746 | Arion intermedius | 167 | AY987920 | Arion wiktori       |
| 56 | AJ809422 | Arion fuscus        | 112 | EU382751 | Arion intermedius |     |          |                     |
| 57 | AJ809413 | Arion fuscus        | 113 | EU382744 | Arion intermedius |     |          |                     |

168

1 List of 40 ND1 accession nos. used.

- 2 AY316292
- 3 AY316261
- 4 AY316262
- 5 AY316250
- 6 AY316265
- 7 AY316249
- 8 AY316263
- 9 AY316264
- 10 AY316251
- 11 AY316247
- 12 AY316246
- 13 AY316245
- 14 AY316254
- 15 AY316267
- 16 AY316252
- 17 AY316253
- 18 AY316256
- 19 AY316255
- 20 AY316266
- 21 AY316260
- 22 AY316259
- 23 AY316257
- 24 AY316258
- 25 AY316243
- 26 AY316244
- 27 AY316232
- 28 AY316233
- 29 AY316234
- 30 AY316235
- 31 AY316248
- 32 AY316230
- 33 AY316238
- 34 AY316239
- 35 AY316240
- 36 AY316242
- 37 AY316241
- 38 AY316228
- 39 AY316229
- 40 AY316231
- 41 AY316237

1 Supplementary Information 3

2 List of taxonomic treatises, determination keys, field guides, etc. consulted.

- 3 • Geyer D (1909) Die Weichtiere Deutschlands. Strecker & Schröder, Stuttgart.
- 4 • Lehmann FX (1884) Einführung in die Molluskenfauna des Grossherzogtums Baden. G.  
5 Braun'sche Hofbuchhandlung, Karlsruhe.
- 6 • Clessin (1884) Deutsche Excursions-Mollusken-Fauna. 2. Auflage, Bauer & Raspe, Nürnberg.
- 7 • Wiktor A (1973) Die Nacktschnecken Polens. Wydawnictwo Naukowe, Warszawa.
- 8 • Ehrmann P (1937) Mollusca. In: Die Tierwelt Mitteleuropas Band II. (Eds: Brohmer P,  
9 Ehrmann P, Ulmer G). Quelle & Meyer, Leipzig.
- 10 • Adam (1947) Revision des Mollusques des la Belgique I: Mollusques terrestres et dulcicoles.  
11 Memoires du Musée Royal d'Histoire Naturelle de Belgique No. 106, Brussels.
- 12 • Germain (1931) Mollusques terrestres et fluviatiles. Faune de la France tome 22. Librairie de  
13 la Faculté des Sciences.
- 14 • Lehmann A (1904) Die Schnecken und Muscheln Deutschlands. Förster & Borries, Zwickau.
- 15 • Hesse P (1926) Die Nacktschnecken der palaearktischen Region. Abhandlungen des Archiv für  
16 Molluskenkunde 2. Verlag der Malakologischen Gesellschaft, Frankfurt am Main.
- 17 • Schaefer M (1992) Brohmer: Fauna von Deutschland. 18. Auflage, Quelle & Meyer Verlag,  
18 Heidelberg.
- 19 • Stresemann E (1976) Exkursionsfauna für die Gebiete der DDR und der BRD - Wirbellose 1.  
20 Volk und Wissen Volkseigener Verlag, Berlin.

21

22
